# Supplementary material for: Possible expression of the 4.2 kyr event in Madagascar and the south-eastAfrican monsoon
Source: Copernicus journal article supplement (doi:10.5194/cp-2020-137), 2020-11-03
Supplement: Supplementary file [file cp-2020-137-SC1-supplement.pdf]

**Comment for:** Scroxton, N., Burns, S. J., McGee, D., Godfrey, L. R., Ranivoharimanana, L., and Faina, P.: Possible expression of the 4.2 kyr event in Madagascar and the south-east African monsoon, *Clim. Past Discuss.* [preprint], <https://doi.org/10.5194/cp-2020-137>, in review, 2020.

This manuscript is interesting but, in my opinion, is lacking some fundamental aspects to fully comprehend the stable oxygen isotope proxies that the author used to reconstruct paleoclimate in Anjohikely. Among these are the description of the cave and its microclimate, where in the cave was it collected, and importantly what are the potential factors that drive oxygen isotope variability inside that cave.

***About the cave:***

In an article published in 1997, Burney and colleagues described (p. 756) that Anjohikely is linked to Anjohibe with a subterranean passage (while citing Laumans et al., 1991). In addition to this, Burney et al. (1997) noted that "most passages in Anjohikely are relatively small in diameter, with somewhat limited development of speleothems (stalactites, stalagmites, and other dripstone formations). This makes me wonder about this sample from Anjohikely, particularly that its size is relatively big if considering the former description and speleothem investigation by Burney et al.

It may be helpful if the authors provide, at least, a sketch or map of the cave, with some illustrative figures of the cave entrance and the chamber from where the speleothems were extracted.

It would also be helpful to have a brief note about the overall microclimatic condition inside the cave (what is the air temperature inside, how about  $p\text{CO}_2$  and relative humidity [RH])? Somewhere in the discussion (L. 224-229) that the authors discuss about kinetic fractionation as processes affecting stalagmites collected from Anjohibe (Wang et al., 2019) versus stalagmites from Anjohikely (their work). If the cave atmospheric exchange with its exterior atmosphere sounds important, information about cave micro-climate (T,  $p\text{CO}_2$ , RH) could be crucial and discussed with more details. Also, I am far from believing that stalagmite growing in Anjohikely was precipitating in equilibrium with the cave drip water, as several studies have proven that almost none of the terrestrial carbonates precipitate in isotopic equilibrium with their drip water (Mickler et al., 2006; Tremaine et al., 2011; Day and Henderson, 2011; Deininger et al., 2012, Daëron et al., 2019).

***About some statements in the paper:***

I disagree with the statement at Line 44 that "the impact of the 4.2 kyr event on the tropics and subtropics is unknown".

- Please consult Railsback et al., 2019, QSR, in which a review of the 4.2 ka event was presented with a new isotopic record from Namibia.
- As the authors also make a comparison with another stalagmite from Anjohibe about the 4.2 ka (Wang et al., 2019 QSR), this statement "unknown" needs to be revised.
- Other relevant information from India could be known by reading Kathayat et al. (2018, CP) and from China (Zhang et al., 2019 CP)

- Some comments in this section may be applicable to the preprint of the same authors (Scroxton, N., Burns, S. J., McGee, D., Godfrey, L. R., Ranivoharimanana, L., and Faina, P.: Circum-Indian ocean hydroclimate at the mid to late Holocene transition: The Double Drought hypothesis and consequences for the Harappan, *Clim. Past Discuss.* [preprint], <https://doi.org/10.5194/cp-2020-138>, in review, 2020)

I am also curious to know the opinion of the authors about the two replicated mid-Holocene hiatuses reported in Voarintsoa et al. (2017 CP) in this region (one in Anjohibe, and another in Anjokipoty). As Anjohikely is a small cave, it is expected to behave like Anjokipoty (hence, should record the same hiatus of mid-Holocene deposition), and this comes back to my point earlier about the need of more details about the cave.

### Interpretation of the data

In Figure 2: the authors indicate a hiatus within the palest color of the oldest generation of stalagmite. I wonder if this hiatus should actually be located at the boundary between the pale-brown color and the whiter color stalagmite (see annotated figure below), and if each of the color change throughout the sample too can indicate other short term growth hiatus?

As a matter of fact, only the bottom stalagmite has more age data. In contrast, the upper part of the stalagmite has lesser trenches. Why is that? Has there be any diagenesis at that brown-pale bottom part that allowed loss of U, hence the samples appear older?

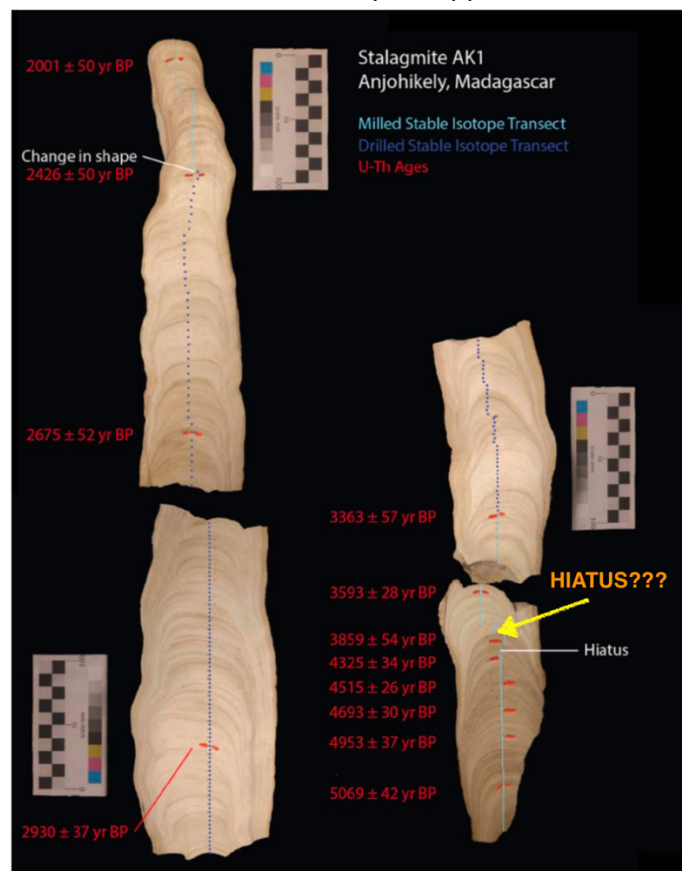

At L. 150: Growth hiatus, what are/is the rational for saying "there is a growth hiatus"? I wonder what are the rational for saying that it indicates dry or wet conditions? While looking at the time series in Figure 3, it appears that the isotopic value bracketing the so-called hiatus are showing

more negative values. Wouldn't this hiatus represent a wet condition? (May be an evaluation of the petrography (e.g., Railsback et al., 2013) would be useful here.

**Presentation of the manuscript:**

I feel that the authors should clearly write a results section and not combine results with discussion, or vice versa. Some short interpretations of the results are acceptable, if these are meant to emphasize the findings, but results should report results. With that said,

- In section 4.1 they should elaborate on the isotopic range, if there are any periodicity, highlight the extreme positive/negative excursion, and provide evidence of the hiatus. The author should also discuss about the growth rate. By looking at their Figure 3a, it seems that growth rate of the bottom part of the sample is slow vs. the upper part of the sample.
- I also feel that some information presented in the discussion belong to the results section (if not mentioning paragraph at L 230, L 235, and L. 242)

The section about the regional variability in the African monsoon (Section 4.2) does not seem to belong into the results section.

**Other detailed comments:**

At L 145: Can you please elaborate, or be specific, on the statement "change in drip hydrology" and "change in cave ventilation regime"?

Figure 3: Can you please replace "Speleothem depth" with "distance from the top of the speleothem"? In my understanding, depth is most commonly applied to sediments that are dig underground.

The authors mention in passing the diameter, the shape, and location of the drip axis (e.g., L. 245), it would be better to apply the layer-bounding surfaces approach (such approach was used in Wang et al., 2019 QSR) to quantify such changes. About the shape of the stalagmite again, I think there is quite a number of literature that they could use to back up their statement.

**Minor editorial errors:**

For some reasons, several of the in-text citations are replicated, if not only mentioning some at Lines 31, 36, 40, and 73). I guess some attention from the authors to avoid such replication is appreciated

If you use aragonitic, then calcitic seems to be parallel. However, it may be better to use aragonite and calcite (e.g., aragonite section..)

**References:**

Burney, D.A., James, H.F., Grady, F.V., Rafamantanantsoa, J.G., Ramilisonina, Wright, H.T., Cowart, J.B., 1997. Environmental change, extinction and human activity: evidence from caves in NW Madagascar. *Journal of Biogeography* 24, 755-767.

Kathayat, G., Cheng, H., Sinha, A., Berkelhammer, M., Zhang, H., Duan, P., Li, H., Li, X., Ning, Y., and Edwards, R. L.: Evaluating the timing and structure of the 4.2 ka event in the Indian

summer monsoon domain from an annually resolved speleothem record from Northeast India, *Clim. Past*, 14, 1869–1879, <https://doi.org/10.5194/cp-14-1869-2018>, 2018.

Railsback, L.B., Liang, F., Brook, G.A., Voarintsoa, N.R.G., Sletten, H.R., Marais, E., Hardt, B., Cheng, H., Edwards, R.L., 2018. The timing, two-pulsed nature, and variable climatic expression of the 4.2 ka event: A review and new high-resolution stalagmite data from Namibia. *Quaternary Sci Rev* 186, 78-90.

Railsback, L.B., Akers, P.D., Wang, L., Holdridge, G.A., Voarintsoa, N.R.G., 2013. Layer-bounding surfaces in stalagmites as keys to better paleoclimatological histories and chronologies. *International Journal of Speleology* 42, 167-180.

Daëron M., Drysdale R. N., Peral M., Huyghe D., Blamart D., Coplen T. B., Lartaud F. and Zanchetta G. (2019) Most Earth-surface calcites precipitate out of isotopic equilibrium. *Nat Comm.* 10, 1–7.

Day C. and Henderson G. (2011) Oxygen isotopes in calcite grown under cave-analogue conditions. *Geochim Cosmochim Acta* 75, 3956–3972.

Deininger M., Fohlmeister J., Scholz D. and Mangini A. (2012) Isotope disequilibrium effects: The influence of evaporation and ventilation effects on the carbon and oxygen isotope composition of speleothems—A model approach. *Geochim Cosmochim Acta* 96, 57–79.

Mickler P. J., Stern L. A. and Banner J. L. (2006) Large kinetic isotope effects in modern speleothems. *GSA Bulletin* 118, 65–81.

Tremaine D. M., Froelich P. N. and Wang Y. (2011) Speleothem calcite farmed in situ: Modern calibration of  $\delta^{18}\text{O}$  and  $\delta^{13}\text{C}$  paleoclimate proxies in a continuously-monitored natural cave system. *Geochim Cosmochim Acta* 75, 4929–4950.

Zhang, H., Cheng, H., Cai, Y., Spötl, C., Kathayat, G., Sinha, A., Edwards, R. L., and Tan, L.: Hydroclimatic variations in southeastern China during the 4.2 ka event reflected by stalagmite records, *Clim. Past*, 14, 1805–1817, <https://doi.org/10.5194/cp-14-1805-2018>, 2018.

Voarintsoa, N. R. G., Railsback, L. B., Brook, G. A., Wang, L., Kathayat, G., Cheng, H., Li, X., Edwards, R. L., Rakotondrazafy, A. F. M., and Madison Razanatsiheno, M. O.: Three distinct Holocene intervals of stalagmite deposition and nondeposition revealed in NW Madagascar, and their paleoclimate implications, *Clim. Past*, 13, 1771–1790, <https://doi.org/10.5194/cp-13-1771-2017>, 2017.
